# Supplementary material for: Perovskite CoSn(OH)6 nanocubes with tuned d-band states towards enhanced oxygen evolution reactions
Source: Royal Society of Chemistry journal article supplement (doi:10.1039/d4nr00975d), 2024-01-01
Supplement: d4nr00975d1.pdf [file d4nr00975d1.pdf]

## *Electronic Supplementary Information*

### **Perovskite $\text{CoSn}(\text{OH})_6$ nanocubes with tuned d-band states towards enhanced oxygen evolution reactions**

Mingwei Sun,<sup>a, b</sup> Baopeng Yang,<sup>c</sup> Jiaying Yan,<sup>b</sup> Yulong Zhou,<sup>b</sup> Zhencong Huang,<sup>b</sup> Ning Zhang,<sup>\*, b</sup> Rong Mo,<sup>\*, a</sup> and Renzhi Ma<sup>\*, d</sup>

<sup>a</sup> Hunan Key Laboratory for Micro-Nano Energy Materials and Devices, School of Physics and Optoelectronics, Xiangtan University, Hunan 411105, P. R. China

<sup>b</sup> School of Materials Science and Engineering, Central South University, Changsha 410083, China

<sup>c</sup> School of Physics and Electronics, Central South University, Changsha 410083, China

<sup>d</sup> Research Center for Materials Nanoarchitectonics (MANA), National Institute for Materials Science (NIMS), 1-1 Namiki, Tsukuba, Ibaraki 305-0044, Japan

\* Corresponding authors: Ning Zhang (nzhang@csu.edu.cn); Rong Mo (morong@xtu.edu.cn); Renzhi Ma (ma.renzhi@nims.go.jp).

## 1. DFT computational details.

In this study, all theoretical calculations were carried out by the Vienna ab-initio Simulation Package (VASP) based on the density functional theory (DFT). The generalized gradient approximation (GGA) in the form of Perdew-Burke-Ernzerhof (PBE) exchange-correlation functional was used to describe the electron exchange-correlation. The interaction between electron and ion was treated by the projector augmented wave (PAW) method. For all calculations, the cut-off energy was set to be 520 eV, the convergence criterion for the self-consistent field energy was set to be  $1.0 \times 10^{-4}$  eV, and the final force on each atom was less than 0.05 eV/Å for each ionic step. A Gamma k-point mesh of  $3 \times 3 \times 1$  was used. Grimme's DFT-D3 method was incorporated to implement the van der Waals correction. The calculated models are shown in Figure S8. In this work, (001) surface of these catalysts was constructed to simulate reaction interface, the vacuum thickness was set to be 20 Å to minimize interlayer interactions. The calculated model includes two octahedral layers, containing six Co (or Fe) atoms, six Sn atoms and thirty-six O atoms. During calculations, the bottom two layers were fixed, but the top one layer was relaxed.

The OER on catalyst surface was simulated according to the following reactions:

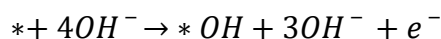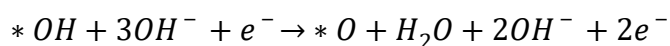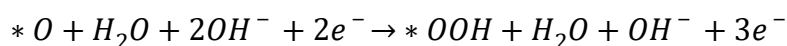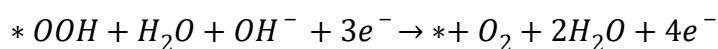

Here, (\*) represent the adsorption site. The free energy change ( $\Delta G$ ) of each elementary reaction was calculated as follows:

$$\Delta G = \Delta E + \Delta ZPE - T \times \Delta S$$

where  $\Delta E$  is the difference of electronic energy between products and reactants,  $\Delta ZPE$  is the change of zero-point energies, and  $\Delta S$  is the entropy change.

**2. Chemicals.** Sodium stannate ( $Na_2SnO_3$ , Analytical Reagent), cobalt chloride hexahydrate ( $CoCl_2 \cdot 6H_2O$ , Analytical Reagent), iron chloride hexahydrate ( $FeCl_3 \cdot 6H_2O$ , AR, 99%), and potassium hydroxide (KOH, ACS) were purchased from

Aladdin Industrial Corporation. Nafion \*D-521 dispersion (5% w/w in water and 1-propanol,  $\geq 0.92$  meq/g exchange capacity) was produced from Alfa Aesar chemical Co. Ltd. All reagents were used as received without further purifying. Deionized water (DI) was used for the synthesis of all samples.

### **3. Synthesis of $\text{CoSn}(\text{OH})_6$ , and $\text{CoSn}(\text{OH})_6$ electrocatalysts.**

Nanocrystals of perovskite hydroxide  $\text{CoSn}(\text{OH})_6$  were prepared by a hydrothermal method. In a typical procedure,  $\text{Na}_2\text{SnO}_3$  (1.0 mmol) and  $\text{CoCl}_2 \cdot 6\text{H}_2\text{O}$  (1.5 mmol) were dissolved in 20 mL deionized water separately. Then, above solutions were mixed and stirred for 10 min. Afterward, the mixed solution was transferred into a sealed Teflon-lined stainless-steel autoclave and subsequently heated on electronic oven at 200 °C for 24 h. After cooling to room temperature, the products were washed several times using distilled water and ethanol. Finally, the products were dried at 60 °C for 12 h. The obtained powders were collected and ground into a fine powder.

### **4. Synthesis of CoFe-LDH electrocatalysts.**

CoFe-LDH was prepared by a hydrothermal method. Typically,  $\text{Co}(\text{NO}_3)_2 \cdot 6\text{H}_2\text{O}$  (0.982 mmol),  $\text{Fe}(\text{NO}_3)_3 \cdot 9\text{H}_2\text{O}$  (0.018 mmol), urea (5 mmol), and  $\text{NH}_4\text{F}$  (2 mmol) were dissolved in DI water (18 mL) to form a precursor solution. Subsequently, the prepared solution was transferred into a Teflon-lined (23 mL) stainless steel vessel. After that, maintained at 200 °C for 24 h. After cooling to room temperature, the CoFe-LDH on NF was rinsed with DI water and ethanol, and then dried at 60 °C for 12 h.

### **5. Characterizations.**

X-Ray Diffraction (XRD) patterns were collected on a RIGAKU Rint-2000 X-ray diffractometer equipped with graphite monochromatized  $\text{Cu-K}\alpha$  radiation ( $\lambda=1.54184\text{\AA}$ ). The scanning electron microscope (SEM) images and energy-dispersive spectra were collected by the JSM-7610FPlus (Jeol, Japan) field emission scanning electron microscopy equipped with an energy dispersive spectrometer (ULTIM MAX 40 integrated on the SEM). Transmission electron microscopy (TEM), selected area electron diffraction (SAED), high-angle annular dark-field (HAADF)-

TEM measurements, and high-resolution transmission electron microscopy (HR-TEM) were obtained on FEI Tecnai G2 F200X field emission transmission electron microscope at an accelerating voltage of 200 kV. EDX elemental mapping was obtained using Talos™ F200X field emission transmission electron microscope at 200 kV. The X-ray photoelectron spectroscopy (XPS) was carried out on a Thermo Scientific K-Alpha spectrophotometer using an Al K $\alpha$  X-ray excitation source ( $h\nu=1486.6$  eV), an analysis area of 400  $\mu\text{m}$  in diameter and a pass energy of 50 eV. The C 1s at 284.8 eV from adventitious carbon was used to calibrate the XPS spectra. In-situ Raman characteristics were performed using a spectroelectrochemical cell (ECC-Opto-Std-Aqu, EL-Cell GmbH, Hamburg, Germany) that uses an Ag/AgCl reference electrode. The potentials measured were converted to RHE.

**6. Electrochemical measurements.** The OER measurements were performed using a conventional three-electrode system using an electrochemical workstation (CHI 760D, Shanghai Chenhua Instrument Co. Ltd.). The working electrode was dry carbon fiber paper (CFP) modified with various catalysts, the counter electrode was a platinum plate (Pt, 1 cm x 1 cm), and the reference electrode was a Hg/HgO (1M KOH-filled) electrode. And the area of carbon fiber paper is fixed at 0.5 x 0.5  $\text{cm}^2$ . For the fabrication of the working electrode, approximately 10 mg of catalyst was dispersed in 2 mL mixed solution of distilled water (1000  $\mu\text{L}$ ), ethanol (1000  $\mu\text{L}$ ) and the proton conducting binder (20  $\mu\text{L}$  5 wt % Nafion), followed by at least 60 min sonication to form a homogeneous ink. Then, 20  $\mu\text{L}$  of the resulting dispersion was dropped onto a piece of dry carbon fiber paper (0.5 x 0.5  $\text{cm}^2$  with an electrocatalyst loading of  $\sim 0.4$   $\text{mg cm}^{-2}$ ). Then the carbon fiber paper was dried in a vacuum oven at 60  $^{\circ}\text{C}$  for 24 h. All potentials were referenced to reversible hydrogen electrode (RHE) by following calculations:  $E_{\text{RHE}} = E_{\text{Hg/HgO}} + 0.059 \times \text{pH} + 0.098$ . The oxygen evolution reaction was evaluated by linear sweep voltammetry (LSV) between 1.0 and 1.8 V (vs. RHE) at a scan rate of 10  $\text{mV s}^{-1}$ . Before collecting the data, cyclic voltammetry (CV) between 1.4 and 1.8 V (vs. RHE) were performed with 200 cycles to reach the stabilization at a scan rate of 30  $\text{mV s}^{-1}$ . The current density was normalized to the geometric area (0.25  $\text{cm}^2$ ) of the carbon fiber paper. The Tafel slope was calculated according to

Tafel equation as follows:  $\eta = b \log j + a$ , where  $\eta$  is overpotential (V),  $j$  is the current density ( $\text{mA cm}^{-2}$ ), and  $b$  is the Tafel slope ( $\text{mV dec}^{-1}$ ). To determine the electrochemical active surface area (ECSA) of different samples, a series of CV curves were collected at different scan rates (20, 40, 60, 80, 100, 120, 140 and 160  $\text{mV s}^{-1}$ ) within an appropriate potential range (1.35 V-1.45 V) where no Faradaic reaction occurred. It could be found that the relationship of the double layer current and the scan rates could be linearly fitted. The double-layer capacitance ( $C_{\text{dl}}$ ) was estimated by the slope of the relationship between  $\Delta j = j_a - j_c$  ( $j_a$  is the anodic current densities and  $j_c$  is the cathodic current densities at 1.40 V vs. RHE) and scan rate. The ECSA was measured and represented by  $C_{\text{dl}}$ . Electrochemical impedance spectroscopy (EIS) technique was carried out under the potential of 1.50 V (vs. RHE) in the frequency range of 0.1 Hz to 100 kHz to determine the  $R_s$  (solution resistance),  $R_{\text{oad}}$  (adsorptive or formative resistance) and  $R_{\text{ct}}$  (charge transfer resistance) of the fabricated electrode. The stability study for OER was measured by chronopotentiometry measurement at 10  $\text{mA cm}^{-2}$  in 1 M KOH solution.

## **7. Photovoltaic-Electrocatalytic Water Splitting Evaluations.**

The Photovoltaic-water electrolysis was characterized by an online gas chromatography (GC-2014C, Shimadzu Corp., Japan). The gas produced from water splitting reactor (Online-3, Shanghai Boyi Scientific Instrument Co., China) was collected by a closed gas-circulation system, which is connected to the online gas chromatography. Typically, the anode (the  $\text{CoSn(OH)}_6\text{-Fe1.8\%}$  catalyst on Ni foam, 1  $\text{cm}^2$ ) and cathode (Pt plate, 1  $\text{cm}^2$ ) were installed on a water splitting reactor and connected to a crystalline silicon solar cell. Two electrodes kept around 3 cm apart. About 300 mL 1 M KOH electrolyte was placed in the water splitting reactor. Then the water splitting reactor and closed gas-circulation system were achieved vacuum state by vacuumizing. A Xe lamp with a wavelength range of 300-800 nm was used to simulate sunlight. The light intensity was controlled by the distance between solar cell and light source or adjusting the input current on Xe lamp. A crystalline silicon solar cell with a total irradiated area of 14.4  $\text{cm}^2$  was applied to convert photo energy to

electric energy. To protect the solar cell from overheating, a circulating water unit was placed between solar cell and light source. Moreover, the voltage from solar cell was monitored a voltmeter. The light intensity was regulated to keep a working voltage of 2.7 V from solar cell after turning on the Xe lamp.

### **8. Calculation of Faradaic Efficiency and solar-to-hydrogen energy conversion Efficiency.**

Faraday efficiency was defined as the ratio between the actual and theoretical yield.

The calculation is as following:

$$\textit{Theoretical gas yield} = \frac{Q}{F \times n} = \frac{I \times t}{F \times n}$$

$$\textit{Faraday efficiency} = \frac{\textit{actual gas yield}}{\textit{Theoretical gas yield}} = \frac{F \times n \times m}{I \times t} \times 100\%$$

F: the Faraday constant (96485.33289 C mol<sup>-1</sup>), n: the number of electron transfer (2 for HER and 4 for OER), m: the actual moles of the product (mol), t: the reaction time (s), I: the current under voltage of 2.7 V, which is deduced by the LSV curve (Figure S13).

The solar-to-hydrogen energy conversion efficiency was defined as the ratio of the H<sub>2</sub> energy to the input solar energy. A spectroradiometer (AvaSolar-1, Avantes, America) was used to measure the light intensity. The calculation is as following:

$$\textit{Solar to hydrogen energy conversion efficiency} = \frac{\textit{H}_2 \textit{ energy (kj)}}{\textit{solar energy (kj)}} \times 100\%$$

H<sub>2</sub> energy (kj) = standard molar enthalpy of combustion (kJ mol<sup>-1</sup>) × H<sub>2</sub> moles (mol).

Solar energy (kj) = light intensity (W cm<sup>-2</sup>) × illumination area (cm<sup>2</sup>) × time (s).

## 9. Additional Figures and Captions

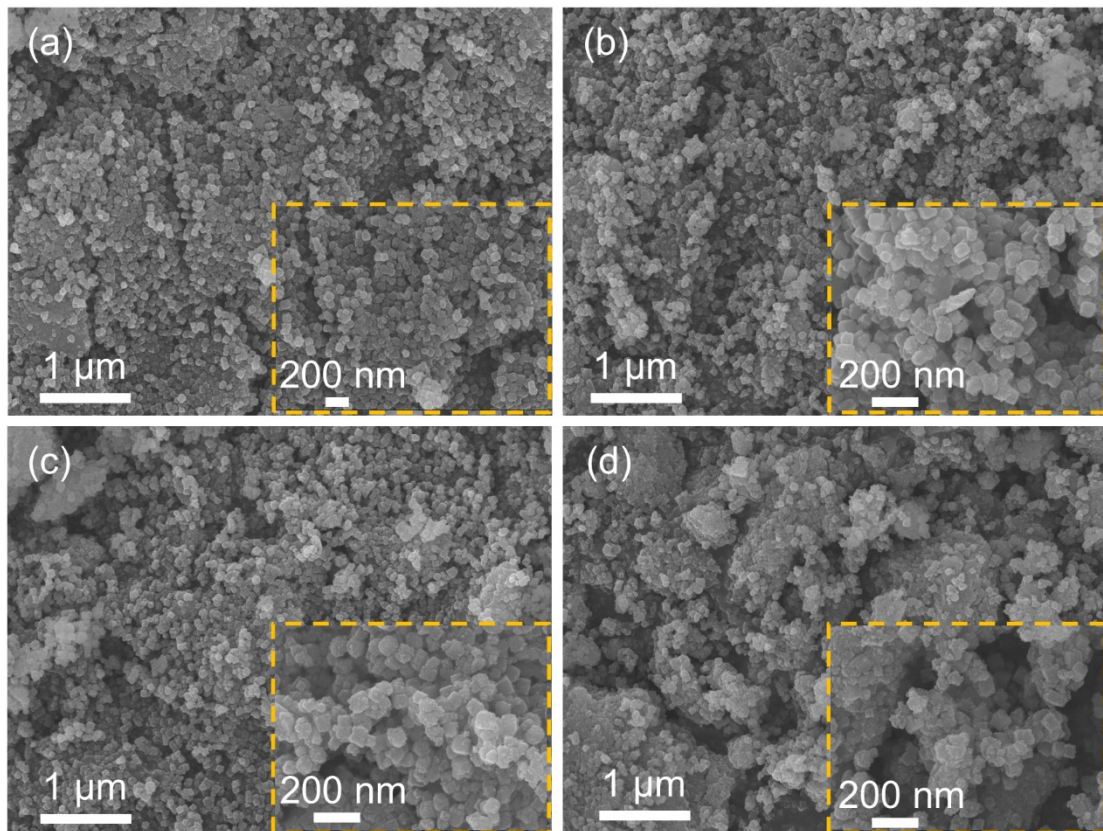

**Fig. S1** SEM images (inset is the enlarged SEM image) of (a)  $\text{CoSn(OH)}_6\text{-Fe0.9\%}$ ; (b)  $\text{CoSn(OH)}_6\text{-Fe1.8\%}$ ; (c)  $\text{CoSn(OH)}_6\text{-Fe2.7\%}$ ; and (d)  $\text{CoSn(OH)}_6\text{-Fe3.8\%}$ .

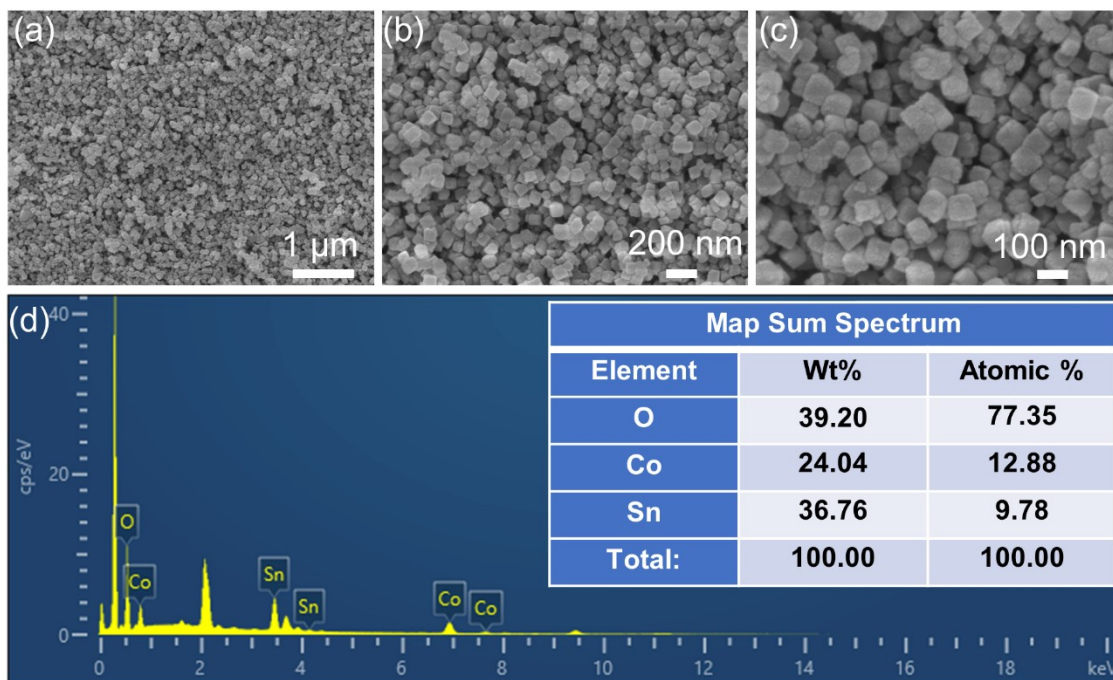

**Fig. S2** (a-b) SEM images and (c) EDX element content result of  $\text{CoSn}(\text{OH})_6$ .



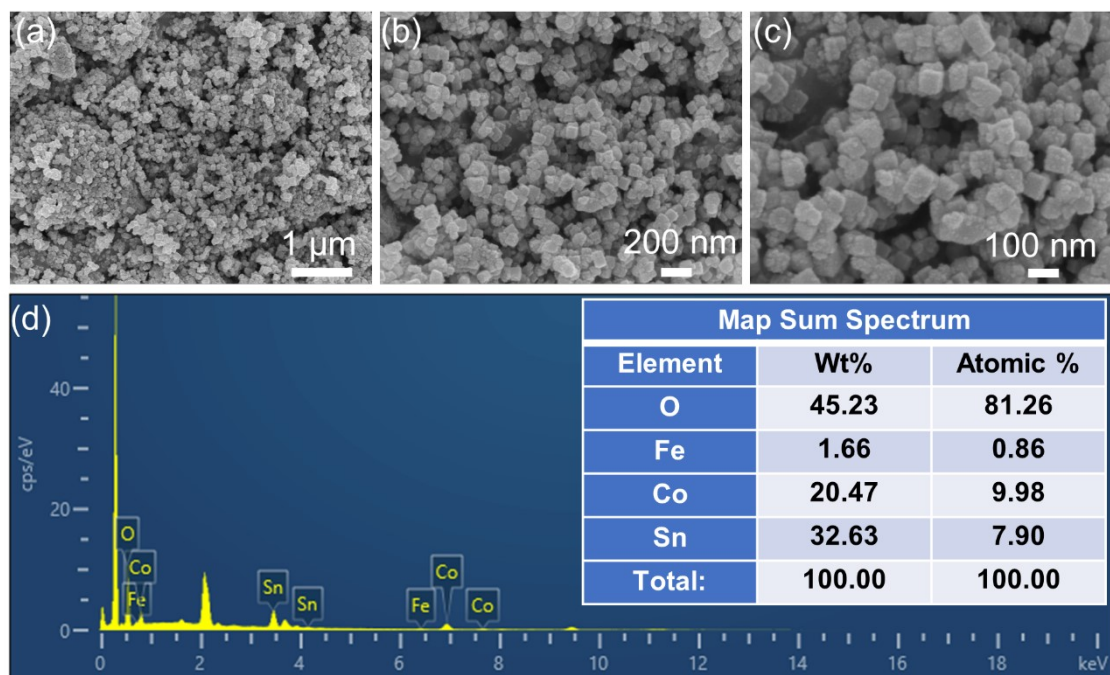

**Fig. S3** (a-b) SEM images and (c) EDX element content result of  $\text{CoSn(OH)}_6\text{-Fe}_{1.8}\%$ .

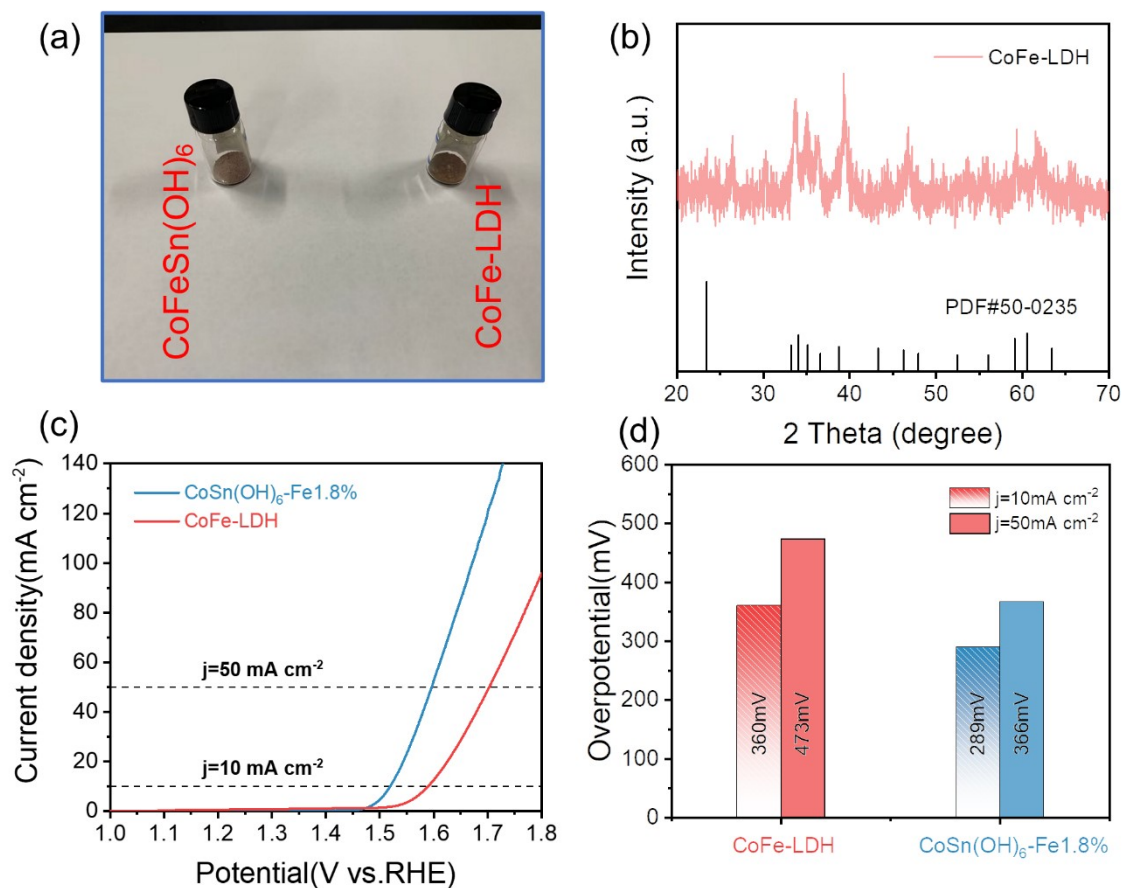

**Fig. S4** (a) Photos of the as-prepared materials; (b) XRD pattern of as synthesized CoFe-LDH; OER performance of CoFe-LDH, and CoSn(OH)<sub>6</sub>-Fe1.8%: (c) LSV curves; and (d) Calculated overpotentials at  $10 \text{ mA cm}^{-2}$  and  $50 \text{ mA cm}^{-2}$ .

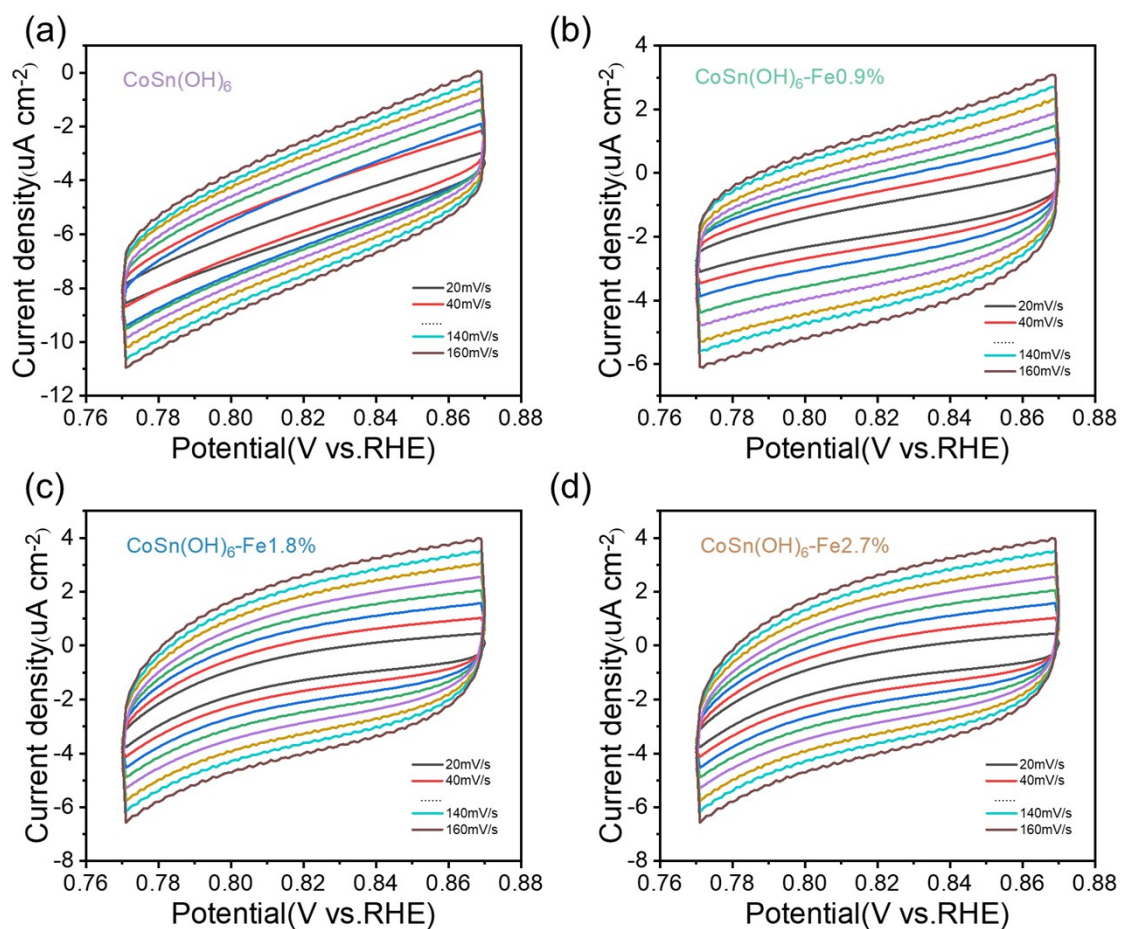

**Fig. S5** CV curves of (a)  $\text{CoSn(OH)}_6$ ; (b)  $\text{CoSn(OH)}_6\text{-Fe}0.9\%$ ; (c)  $\text{CoSn(OH)}_6\text{-Fe}1.8\%$ ; and (d)  $\text{CoSn(OH)}_6\text{-Fe}2.7\%$ , with the scan rates of 20, 40, 60, 80, 100, 120, 140 and 160 mV/s.

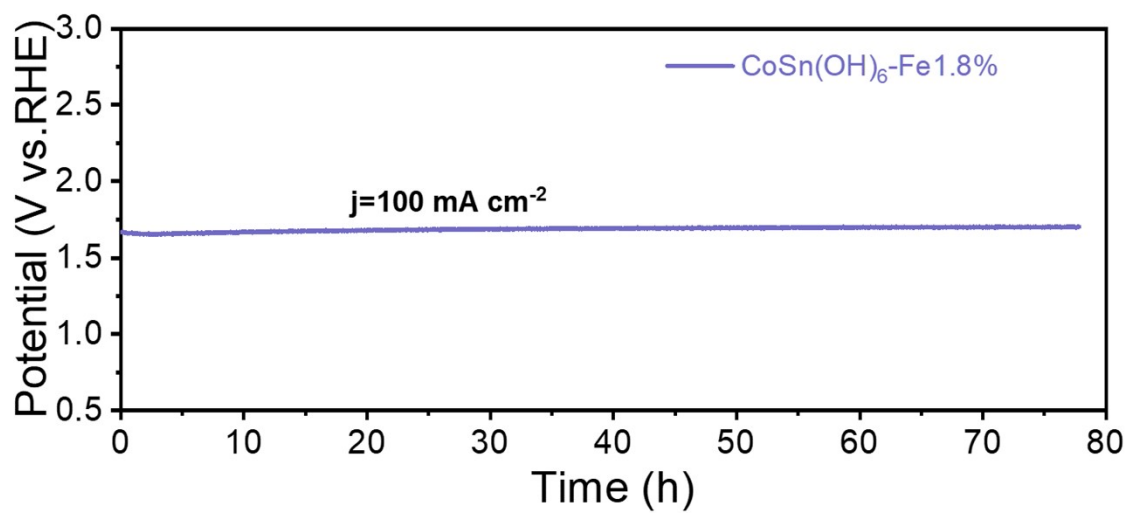

**Fig. S6** Chronopotentiometry curves of CoSn(OH)<sub>6</sub>-Fe1.8% at 100 mA cm<sup>-2</sup>.

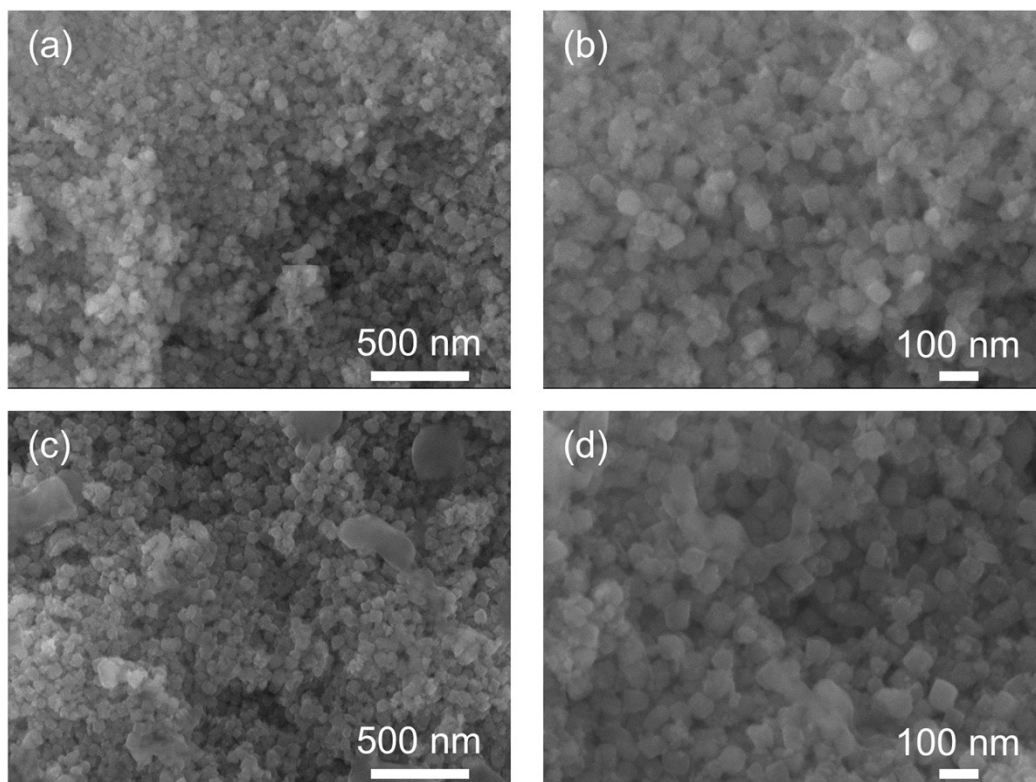

**Fig. S7** (a-b) SEM images of  $\text{CoSn(OH)}_6\text{-Fe1.8\%}$  before the stability measurement; (c-d) SEM images of  $\text{CoSn(OH)}_6\text{-Fe1.8\%}$  after the stability measurement.

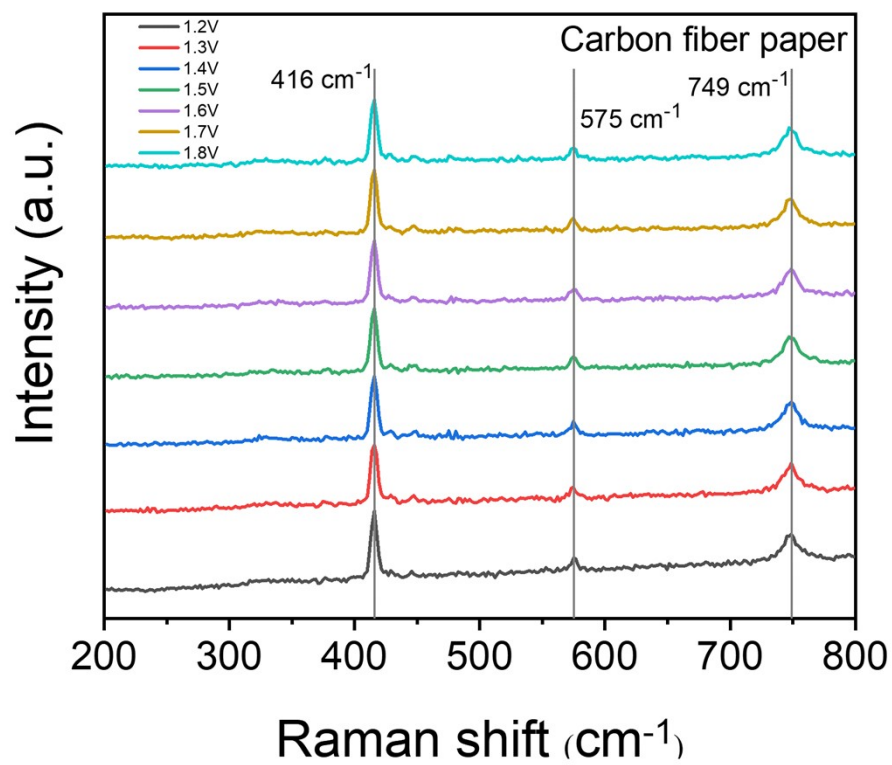

**Fig. S8** In-situ Raman spectra of bare carbon fiber paper.

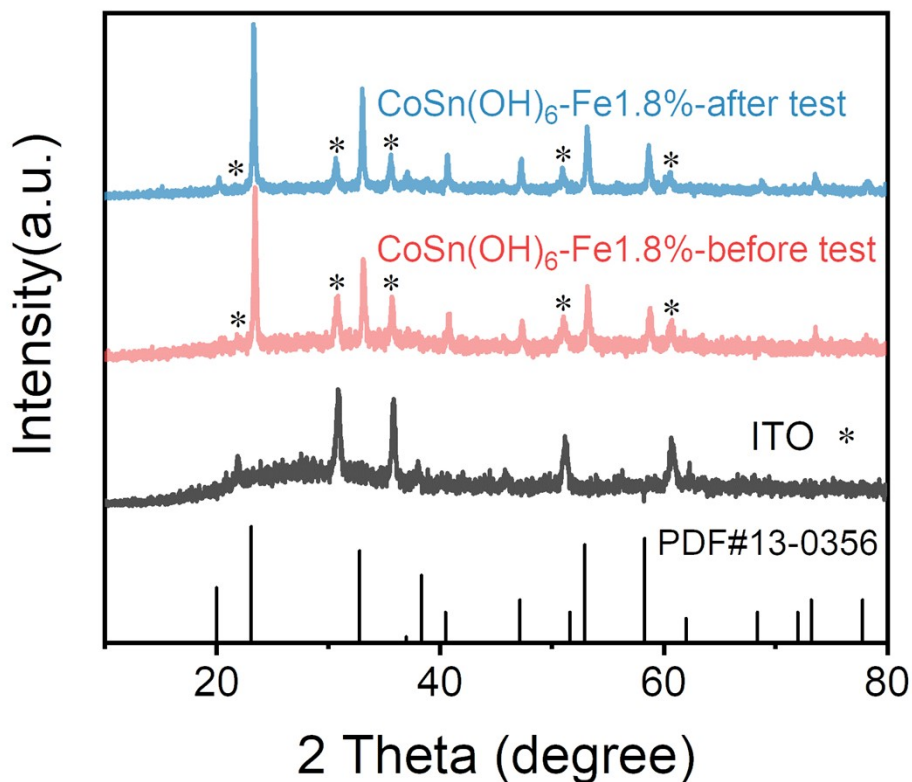

**Fig. S9** XRD patterns of CoSn(OH)<sub>6</sub>-Fe1.8% before and after OER test.

During the XRD inspection process, the peaks of the catalyst material tend to be covered by the peaks of the carbon paper due to the use of carbon paper as a carrier to load the catalyst. In order to better show the difference before and after the electrochemical reaction, ITO glass was chosen as the substrate for the loaded catalyst.

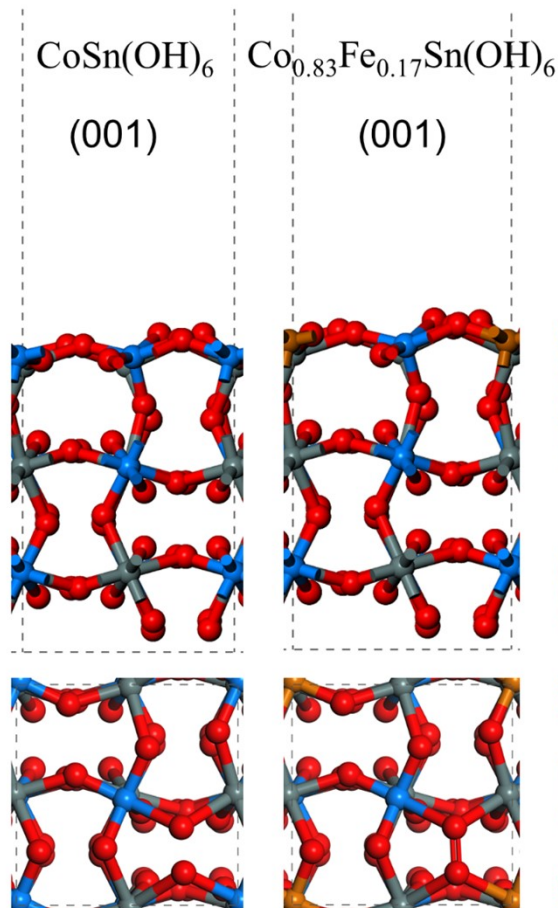

**Fig. S10** The atomic models of (001) surface for  $\text{CoSn(OH)}_6$ , and  $\text{Co}_{0.83}\text{Fe}_{0.17}\text{Sn(OH)}_6$ .



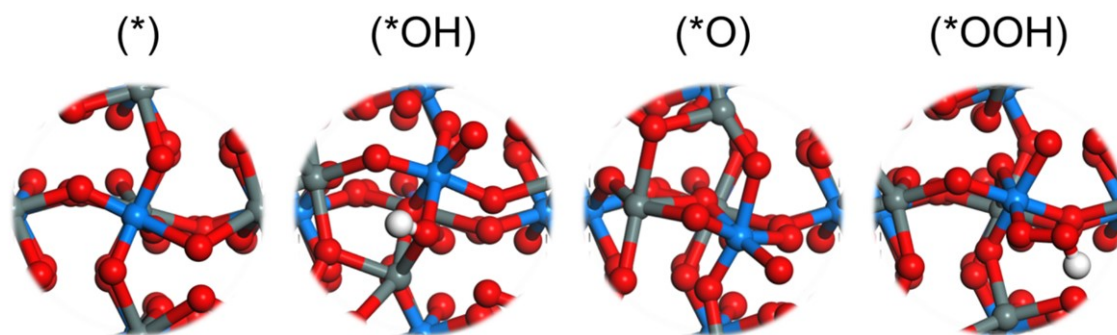

**Fig. S11** Adsorption models for various OER steps of  $\text{CoSn}(\text{OH})_6$ .

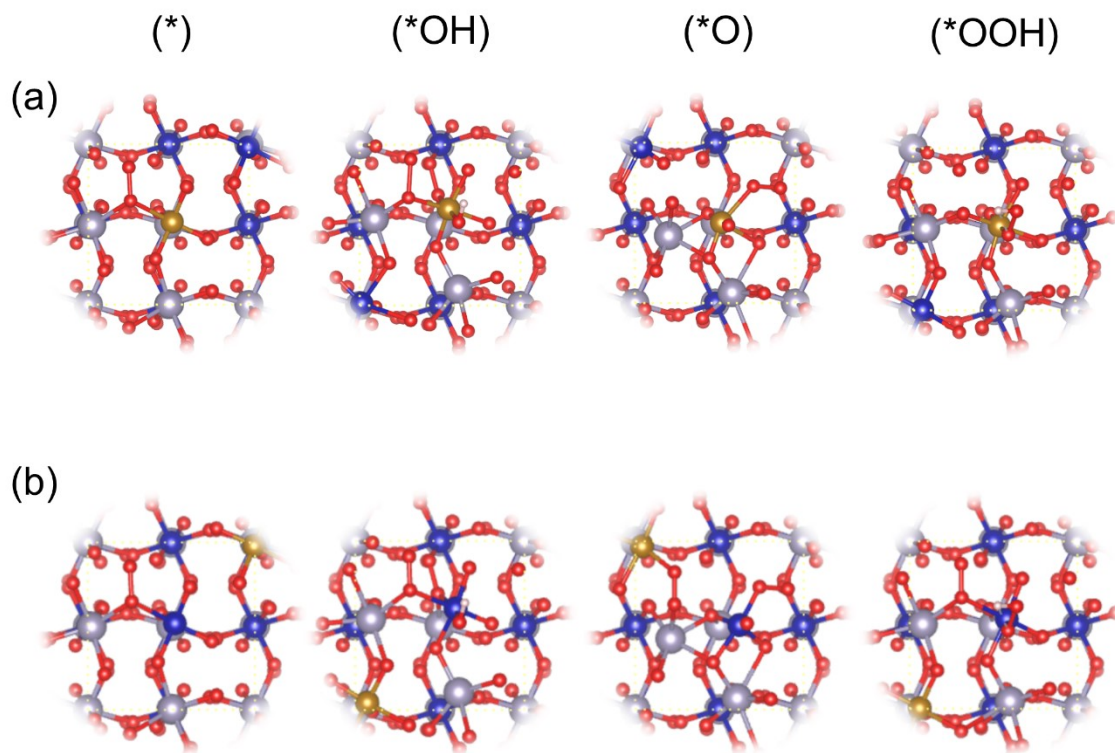

**Fig. S12** Adsorption models for various OER steps of  $\text{Co}_{0.83}\text{Fe}_{0.17}\text{Sn}(\text{OH})_6$ : (a) Fe site; (b) Co site.

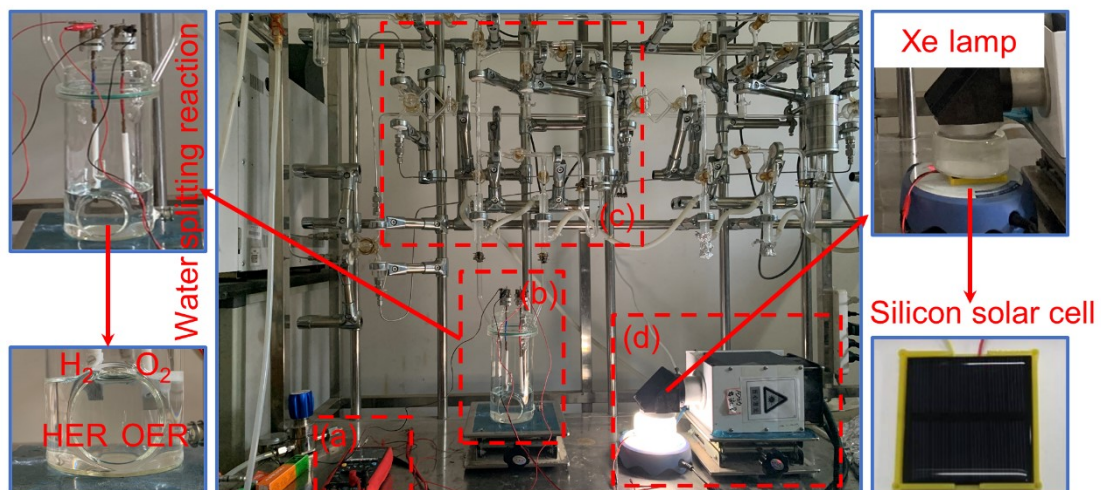

**Fig. S13** The photograph of photovoltaic-electrocatalytic water splitting system. (a) A voltmeter; (b) Water splitting reactor; (c) The closed gas-circulation system; (d) Power supply system.

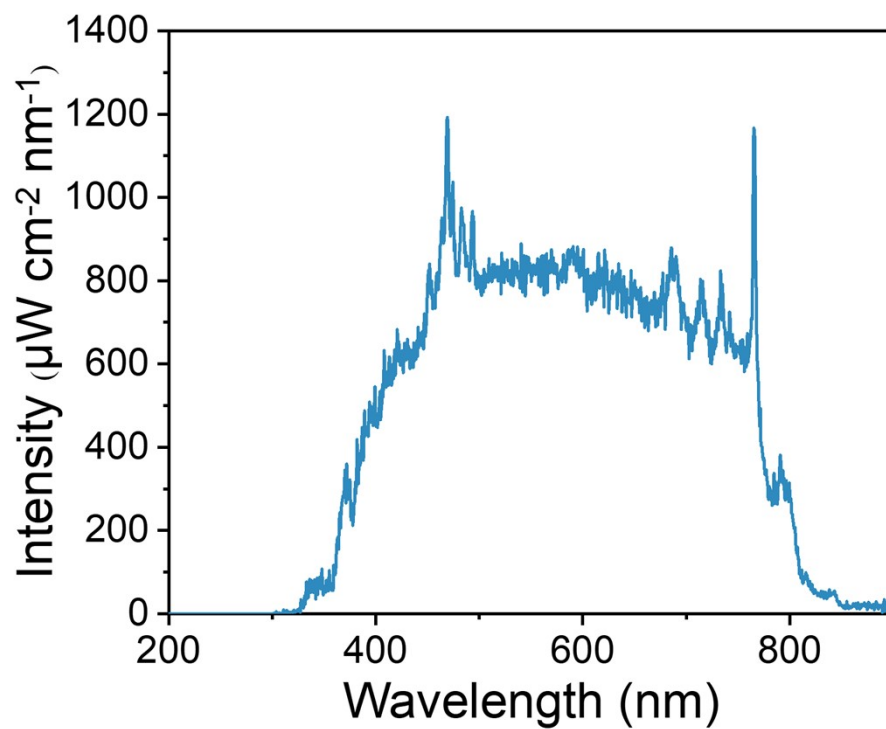

**Fig. S14** Irradiative spectrum of the Xe lamp (the major intensity is concentrated on the range of  $300 < \lambda < 800$  nm).

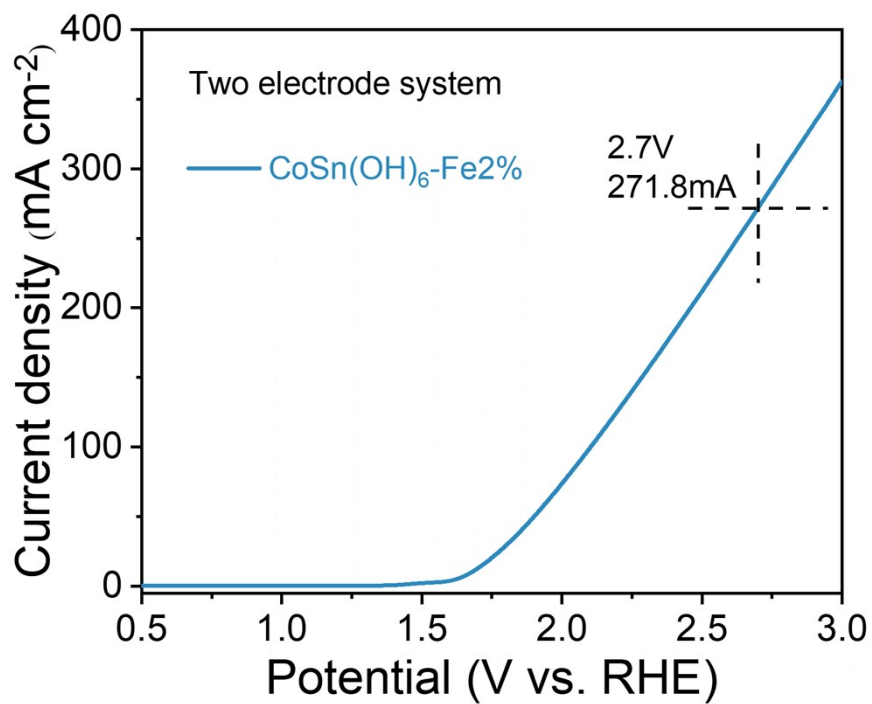

**Fig. S15** Linear sweep voltammetry curve of the two-electrode system.

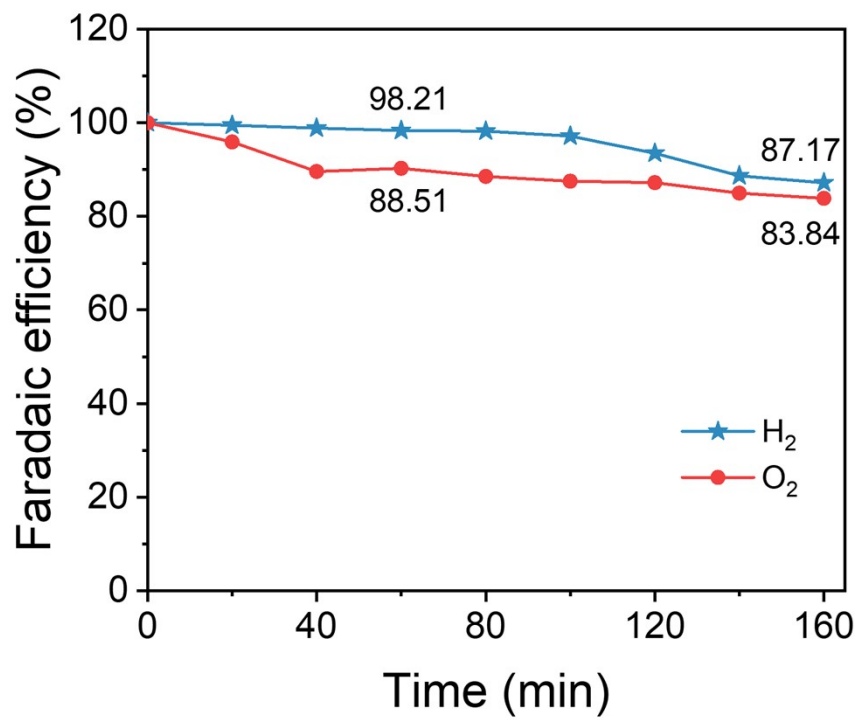

**Fig. S16** The calculated Faradaic efficiency.

**Table S1** Inductively Coupled Plasma Optical Emission Spectrometer (ICP-OES) elemental content analysis of Fe<sup>3+</sup> doped CoSn(OH)<sub>6</sub>.

| Sample number | Atomic content |        |        |
|---------------|----------------|--------|--------|
|               | Fe             | Co     | Sn     |
| 1             | /              | 21.53% | 39.27% |
| 2             | 0.92%          | 19.00% | 36.00% |
| 3             | 1.77%          | 18.09% | 35.87% |
| 4             | 2.69%          | 16.76% | 37.01% |

**Table S2** The value of  $R_s$  and  $R_{ct}$  were obtained by fitting the EIS curves.

| Products                           | $R_s$         | $R_{ct}$        |
|------------------------------------|---------------|-----------------|
| $\text{CoSn(OH)}_6$                | $5.2 \pm 0.8$ | $100.8 \pm 2.6$ |
| $\text{CoSn(OH)}_6\text{-Fe}0.9\%$ | $6.1 \pm 0.3$ | $18.1 \pm 0.2$  |
| $\text{CoSn(OH)}_6\text{-Fe}1.8\%$ | $5.1 \pm 0.3$ | $11.5 \pm 0.1$  |
| $\text{CoSn(OH)}_6\text{-Fe}2.7\%$ | $6.1 \pm 0.1$ | $63.2 \pm 0.2$  |



**Table S3** Comparison between CoSn(OH)<sub>6</sub>-Fe1.8% and other reported FeCoNi-based catalysts for OER in alkaline electrolyte.

| Catalyst                                                                                   | Electrolyte | $\eta^{(a)}$ | T <sup>(b)</sup> | Stability                           | References |
|--------------------------------------------------------------------------------------------|-------------|--------------|------------------|-------------------------------------|------------|
| CoSn(OH) <sub>6</sub> -Fe1.8%                                                              | 1 M KOH     | 289          | 54.3             | 78 h (at 100 mA cm <sup>-2</sup> )  | This work  |
| A-FeCoW                                                                                    | 1 M KOH     | 301          | 70               | 12 h (at 30 mA cm <sup>-2</sup> )   | Ref. 1     |
| FeCoMoW                                                                                    | 1 M KOH     | 212          | None             | 12 h (at 300 mA cm <sup>-2</sup> )  | Ref. 2     |
| Co-Fe-N-C                                                                                  | 1 M KOH     | 320          | 40               | 4.2 h (at 1 mA cm <sup>-2</sup> )   | Ref. 3     |
| CoFe LDH                                                                                   | 1 M KOH     | 404          | None             | None                                | Ref. 4     |
| Co-Fe-P nanoboxes                                                                          | 1 M KOH     | 330          | 52               | 16 h (at 50 mA cm <sup>-2</sup> )   | Ref. 5     |
| Co(OH)F                                                                                    | 1 M KOH     | 313          | 52.8             | 10 h (at 8 mA cm <sup>-2</sup> )    | Ref. 6     |
| Fe <sub>3</sub> C-Co                                                                       | 1 M KOH     | 340          | None             | 16.7 h (at 10 mA cm <sup>-2</sup> ) | Ref. 7     |
| SrNb <sub>0.1</sub> Co <sub>0.7</sub> Fe <sub>0.2</sub> O <sub>3-<math>\delta</math></sub> | 0.1 M KOH   | 420          | 76               | After 1000 CV                       | Ref. 8     |
| BaCo <sub>0.7</sub> Fe <sub>0.2</sub> Sn <sub>0.1</sub> O <sub>3-<math>\delta</math></sub> | 0.1 M KOH   | 450          | 69               | 2 h (at 10 mA cm <sup>-2</sup> )    | Ref. 9     |
| Activated SnCo(OH) <sub>6</sub>                                                            | 1 M KOH     | 320          | None             | 13 h (at 5 mA cm <sup>-2</sup> )    | Ref. 10    |
| $\alpha$ -Co(OH) <sub>2</sub>                                                              | 1 M KOH     | 340          | 81               | 12 h (at 10 mA cm <sup>-2</sup> )   | Ref. 11    |
| Co(OH) <sub>2</sub> @NC                                                                    | 1 M KOH     | 330          | 79               | After 3000 CV                       | Ref. 12    |
| ZIF-67@Co(OH) <sub>2</sub>                                                                 | 1 M KOH     | 354          | 73               | 6 h (at 10 mA cm <sup>-2</sup> )    | Ref. 13    |
| Ti/NiO-SnO <sub>2</sub>                                                                    | 1 M NaOH    | 622          | 53               | 2 h (at 10 mA cm <sup>-2</sup> )    | Ref. 14    |
| Mn <sub>3</sub> O <sub>4</sub> @SnO <sub>2</sub> /Co <sub>3</sub> O <sub>4</sub>           | 1 M KOH     | 420          | 70.1             | After 100 CV                        | Ref. 15    |
| Ni <sub>0.75</sub> Fe <sub>0.25</sub> (OH) <sub>x</sub>                                    | 1 M KOH     | 310          | 68               | 10 h (at 10 mA cm <sup>-2</sup> )   | Ref. 16    |
| CoSHN                                                                                      | 1 M KOH     | 358          | 58.6             | 2 h (at 10 mA cm <sup>-2</sup> )    | Ref. 17    |
| Fe Doped NiO                                                                               | 0.5 M KOH   | 310          | 25               | 2 h (at 10 mA cm <sup>-2</sup> )    | Ref. 18    |
| Fe Doped NiCo <sub>2</sub> O <sub>4</sub>                                                  | 1 M KOH     | 350          | 27               | After 1000 CV                       | Ref. 19    |

(a) overpotential (mV) at current density of 10 mA cm<sup>-2</sup>; (b) Tafel slope (mV dec<sup>-1</sup>).

## References

1. B. Zhang, X. Zheng, O. Voznyy, R. Comin, M. Bajdich, M. García-Melchor, L. Han, J. Xu, M. Liu, L. Zheng, F. P. García de Arquer, C. T. Dinh, F. Fan, M. Yuan, E. Yassitepe, N. Chen, T. Regier, P. Liu, Y. Li, P. De Luna, A. Janmohamed, H. L. Xin, H. Yang, A. Vojvodic and E. H. Sargent, *Science*, 2016, **352**, 333-337.
2. B. Zhang, L. Wang, Z. Cao, S. M. Kozlov, F. P. García de Arquer, C. T. Dinh, J. Li, Z. Wang, X. Zheng, L. Zhang, Y. Wen, O. Voznyy, R. Comin, P. De Luna, T. Regier, W. Bi, E. E. Alp, C.-W. Pao, L. Zheng, Y. Hu, Y. Ji, Y. Li, Y. Zhang, L. Cavallo, H. Peng and E. H. Sargent, *Nature Catalysis*, 2020, **3**, 985-992.
3. L. Bai, C.-S. Hsu, D. T. L. Alexander, H. M. Chen and X. Hu, *Nature Energy*, 2021, **6**, 1054-1066.
4. F. Dionigi, Z. Zeng, I. Sinev, T. Merzdorf, S. Deshpande, M. B. Lopez, S. Kunze, I. Zegkinoglou, H. Sarodnik, D. Fan, A. Bergmann, J. Drnec, J. F. d. Araujo, M. Gliech, D. Teschner, J. Zhu, W.-X. Li, J. Greeley, B. R. Cuenya and P. Strasser, *Nature Communications*, 2020, **11**, 2522.
5. T. Wang, C. Wang, Y. Jin, A. Sviripa, J. Liang, J. Han, Y. Huang, Q. Li and G. Wu, *Journal of Materials Chemistry A*, 2017, **5**, 25378-25384.
6. S. Wan, J. Qi, W. Zhang, W. Wang, S. Zhang, K. Liu, H. Zheng, J. Sun, S. Wang and R. Cao, *Advanced Materials*, 2017, **29**, 1700286.
7. C. C. Yang, S. F. Zai, Y. T. Zhou, L. Du and Q. Jiang, *Advanced Functional Materials*, 2019, **29**, 1901949.
8. Y. Zhu, W. Zhou, Z.-G. Chen, Y. Chen, C. Su, M. O. Tadé and Z. Shao, *Angewandte Chemie International Edition*, 2015, **54**, 3897-3901.
9. X. Xu, C. Su, W. Zhou, Y. Zhu, Y. Chen and Z. Shao, *Advanced Science*, 2016, **3**, 1500187.
10. F. Song, K. Schenk and X. Hu, *Energy & Environmental Science*, 2016, **9**, 473-477.
11. B. Cao, C. Luo, J. Lao, H. Chen, R. Qi, H. Lin and H. Peng, *ACS Omega*, 2019, **4**, 16612-16618.
12. G. Li, C. Liu, Z. Zhang, B. Cui, Y. Chen, Y. Deng and W. Hu, *Journal of*

*Materials Science & Technology*, 2021, **81**, 131-138.

13. J.-F. Qin, J.-Y. Xie, N. Wang, B. Dong, T.-S. Chen, Z.-Y. Lin, Z.-Z. Liu, Y.-N. Zhou, M. Yang and Y.-M. Chai, *Journal of Colloid and Interface Science*, 2020, **562**, 279-286.

14. M. Wu, Y. Li, J. Du, C. Tao and Z. Liu, *ACS Omega*, 2020, **5**, 22652-22660.

15. Y. Song, H. Liu, W. Dong and M. Li, *International Journal of Hydrogen Energy*, 2020, **45**, 4501-4510.

16. T. Tian, M. Zheng, J. Lin, X. Meng and Y. Ding, *Chemical Communications*, 2019, **55**, 1044-1047.

17. J. Zhu, S. Li, Z. Zhuang, S. Gao, X. Hong, X. Pan, R. Yu, L. Zhou, L. V. Moskaleva and L. Mai, *Energy & Environmental Materials*, 2022, **5**, 231-237.

18. A. C. Pebley, E. Decolvenaere, T. M. Pollock and M. J. Gordon, *Nanoscale*, 2017, **9**, 15070-15082.

19. K.-L. Yan, X. Shang, Z. Li, B. Dong, X. Li, W.-K. Gao, J.-Q. Chi, Y.-M. Chai and C.-G. Liu, *Applied Surface Science*, 2017, **416**, 371-378.
